# Supplementary material for: Identification and Functional Analysis of Healing Regulators in Drosophila
Source: PLOS journal article supplement (doi:10.1371/journal.pgen.1004965), 2015-02-03

## **Supplementary Figure 4**

Clustering by absolute expression value

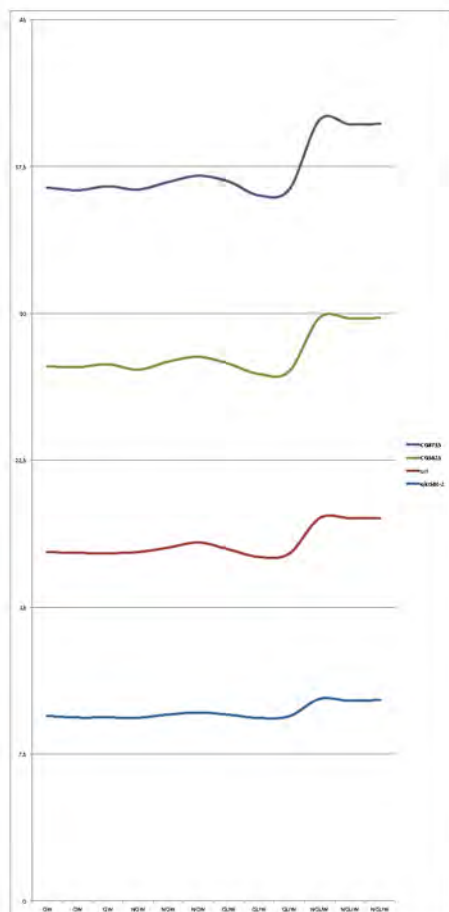

1112

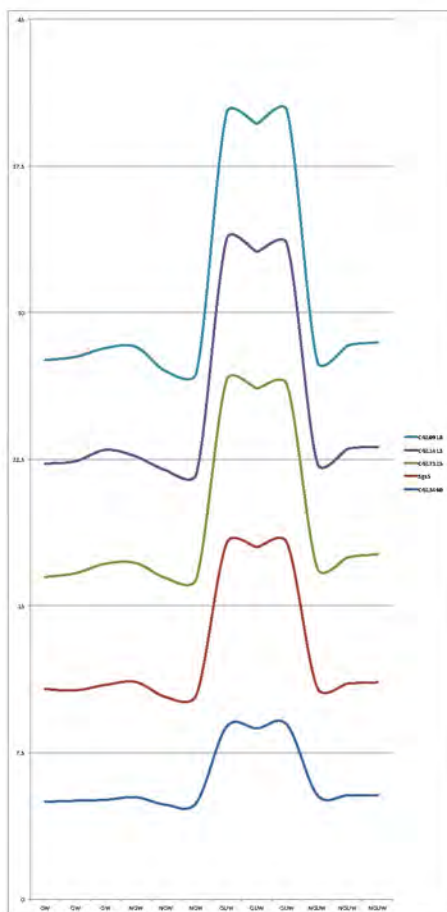

1121

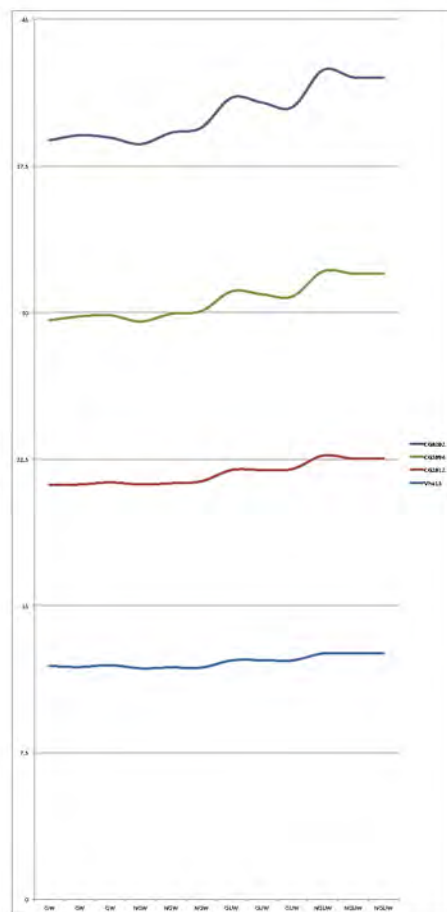

1123

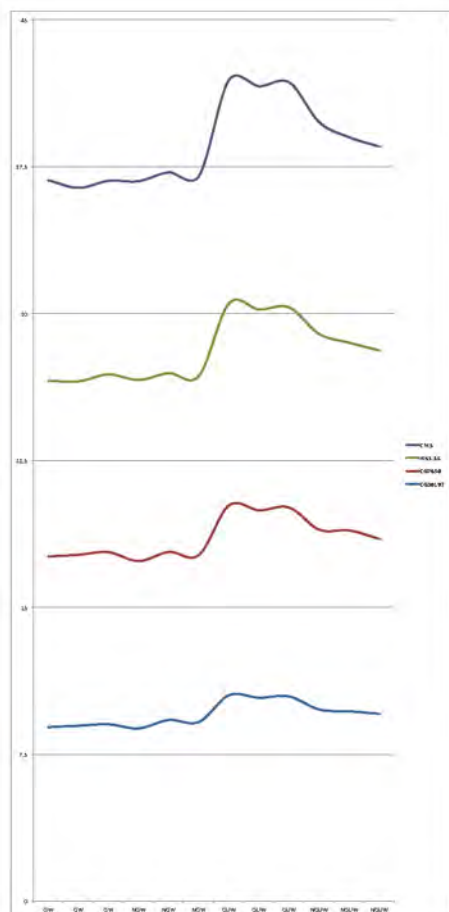

1132

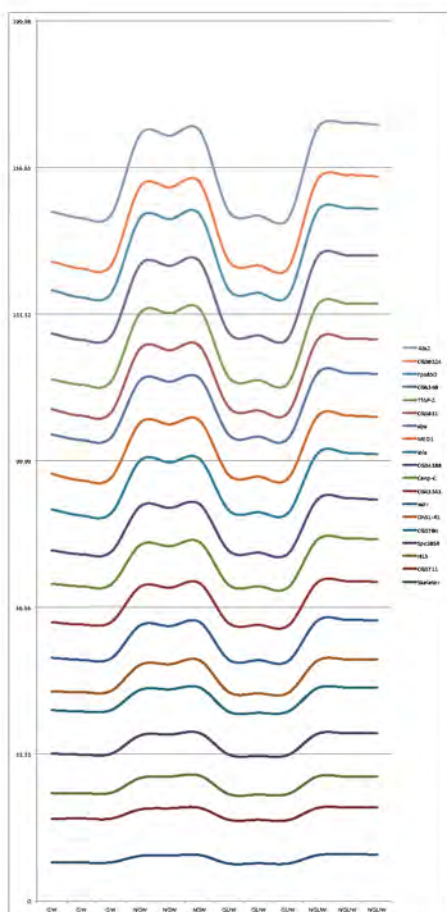

1212

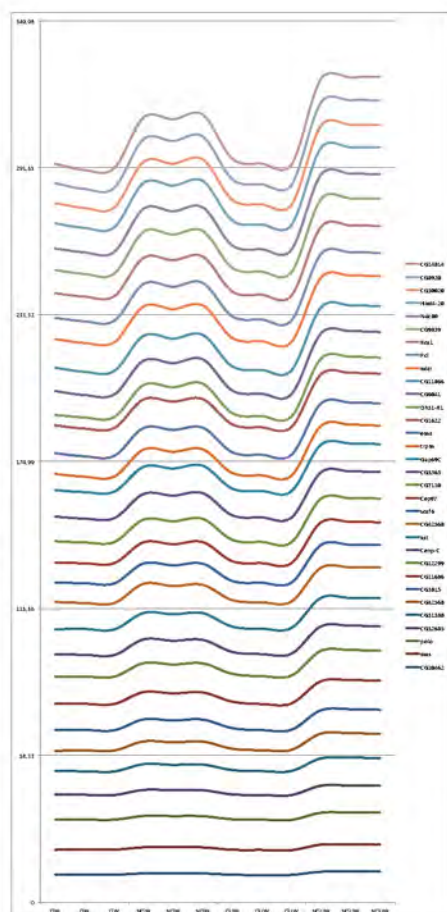

1213

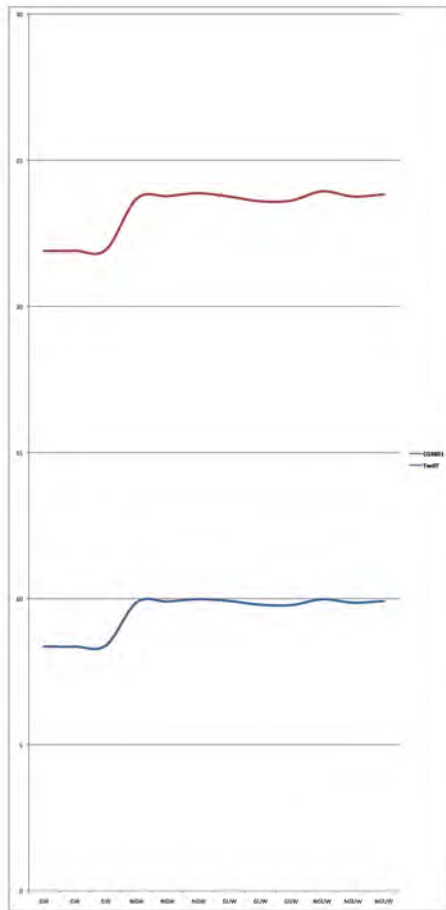

1222

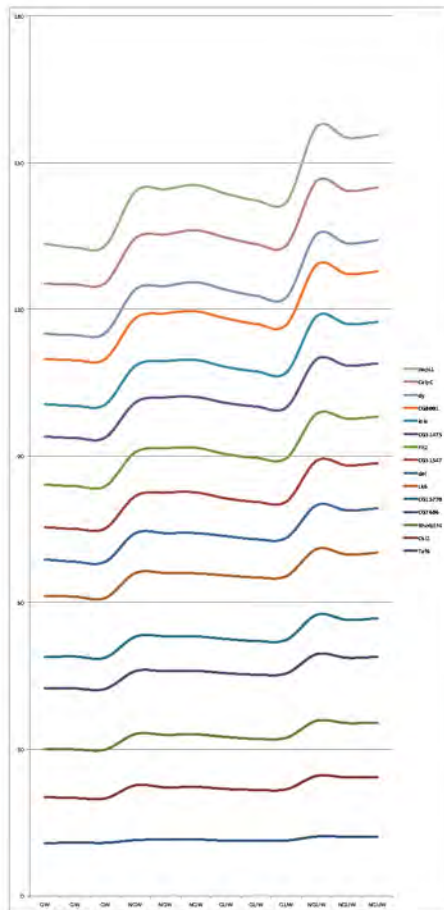

1223

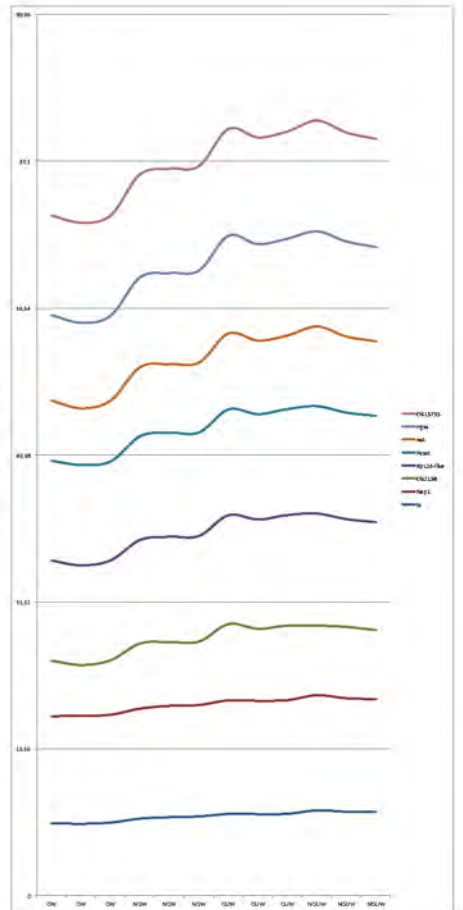

1233

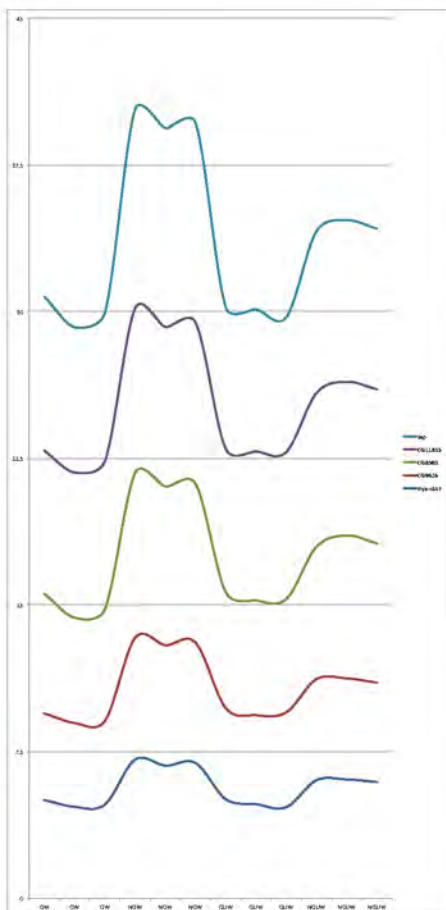

1312

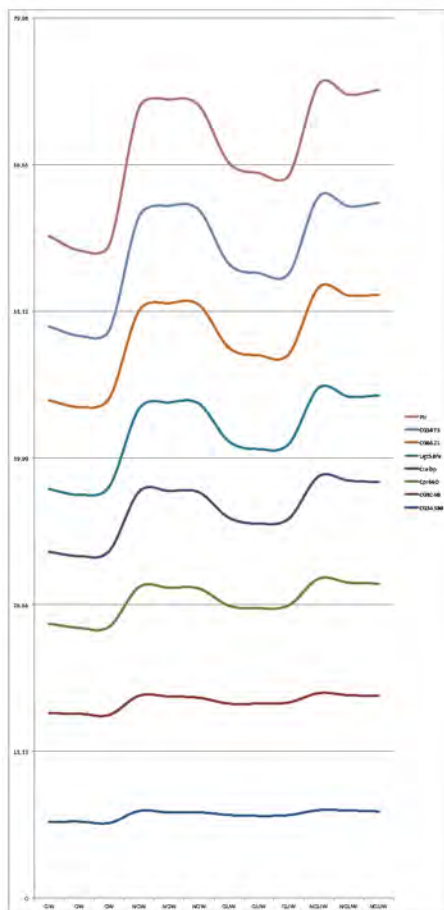

1323

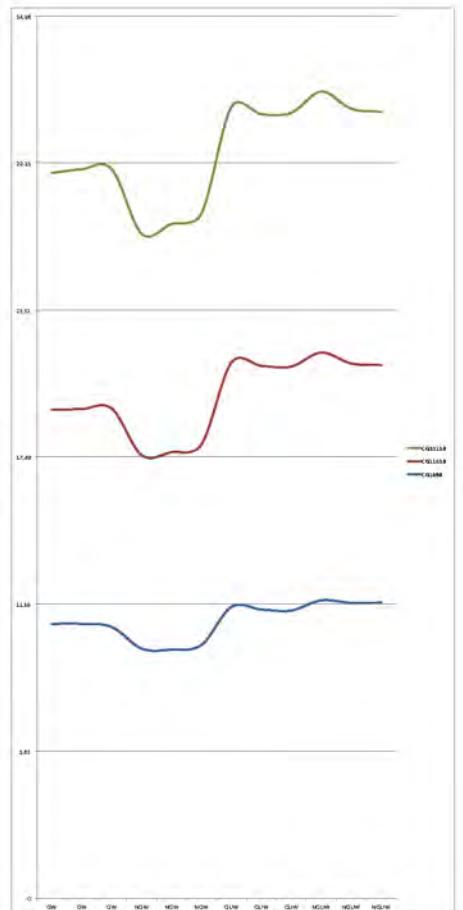

2133

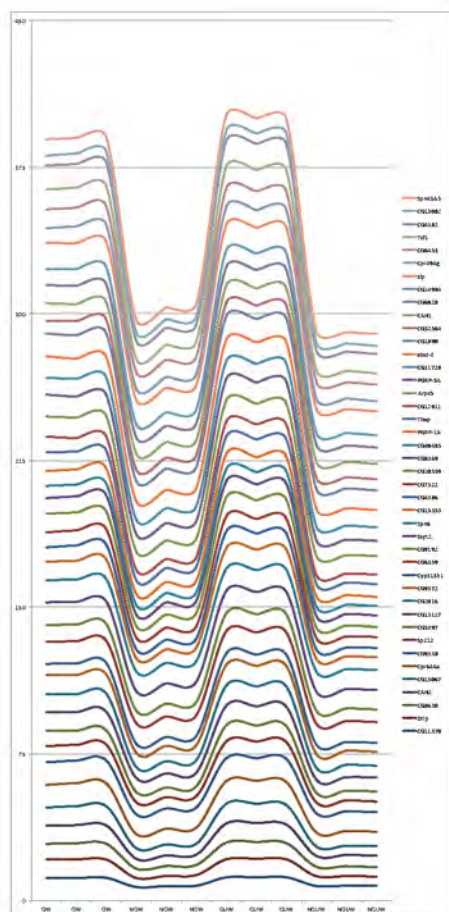

2121

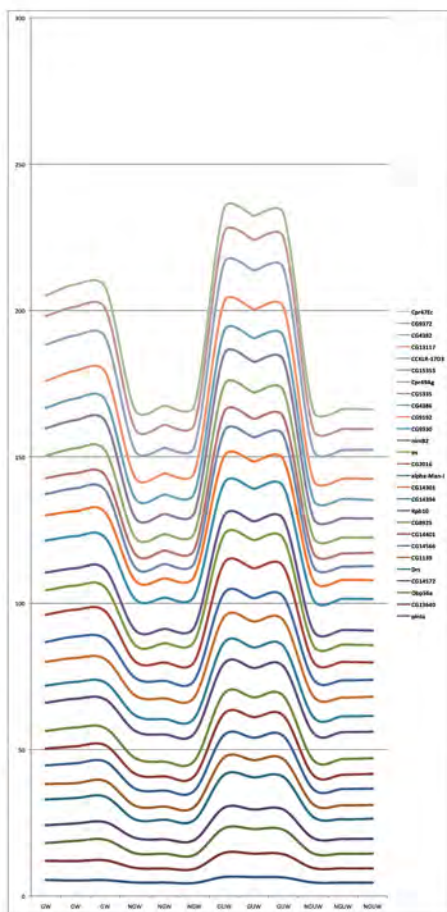

2131

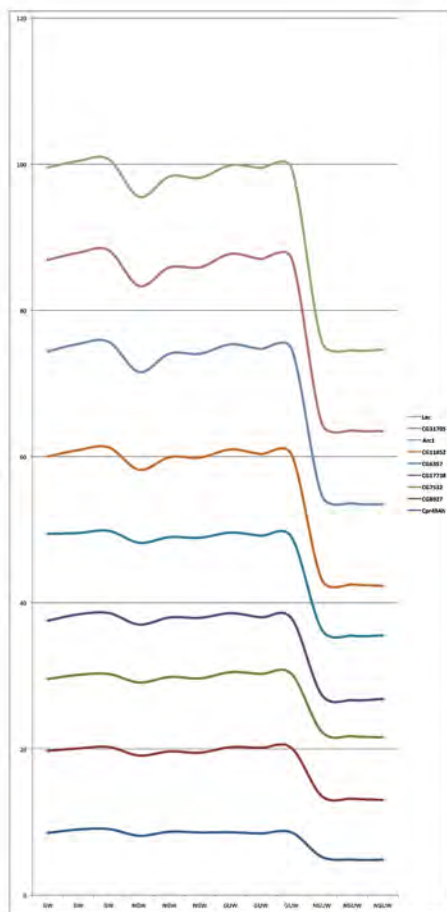

2221

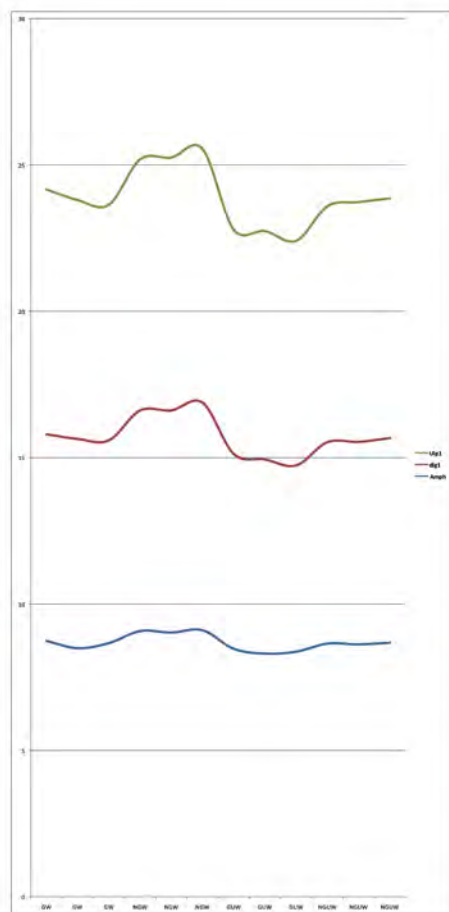

2312

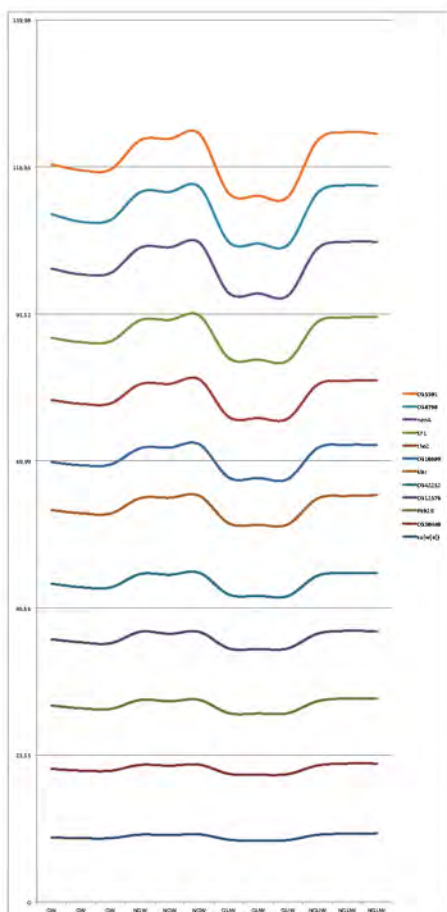

2313

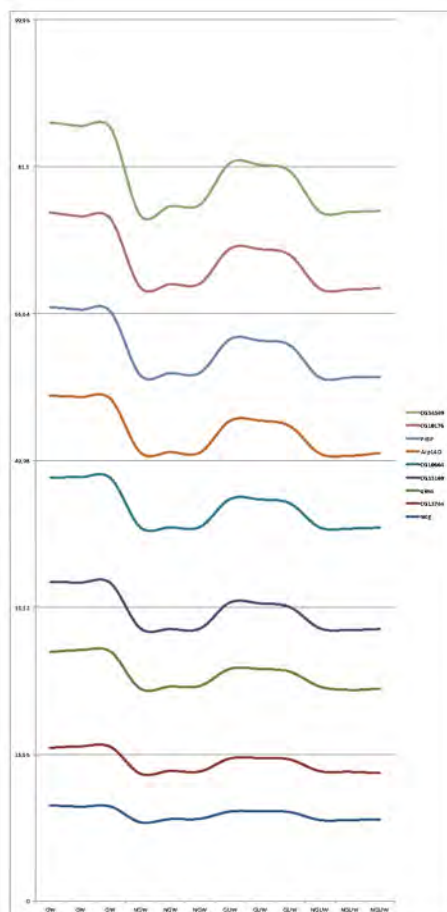

3121



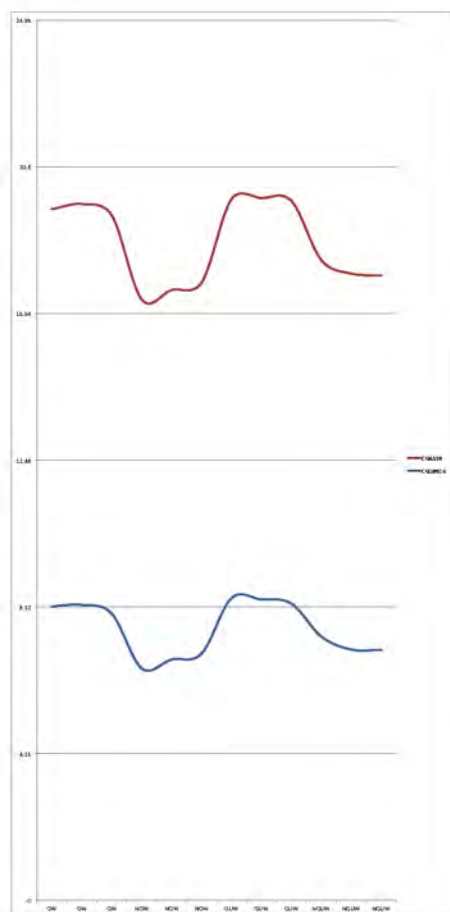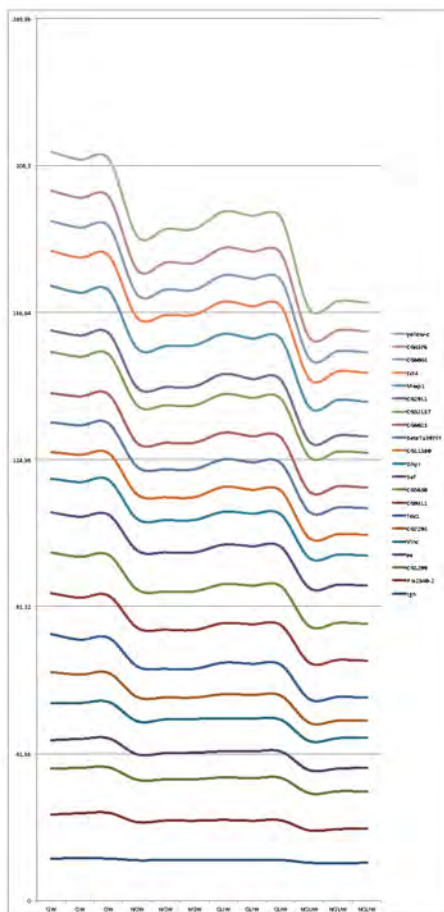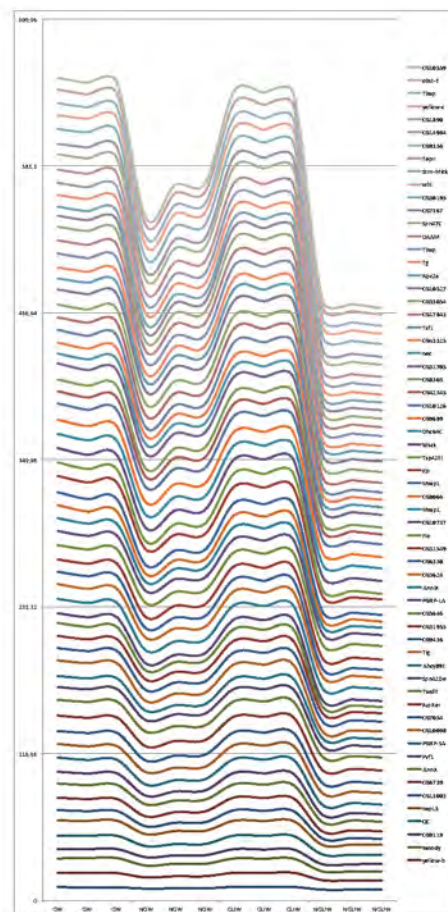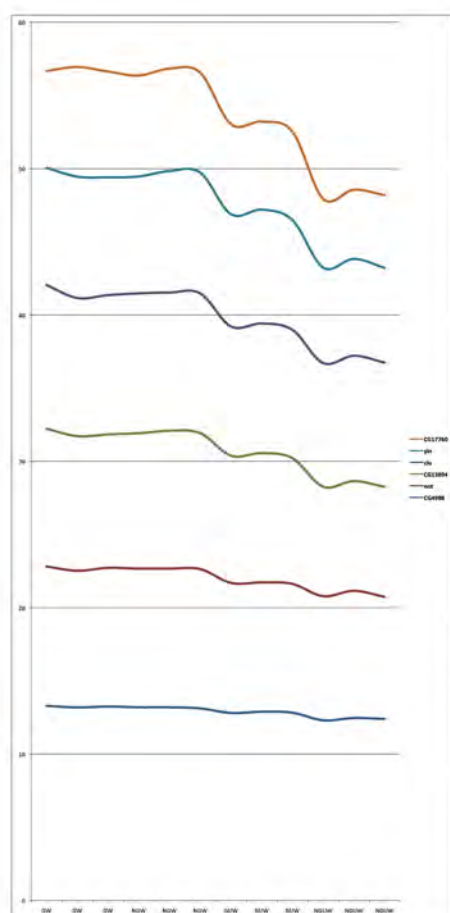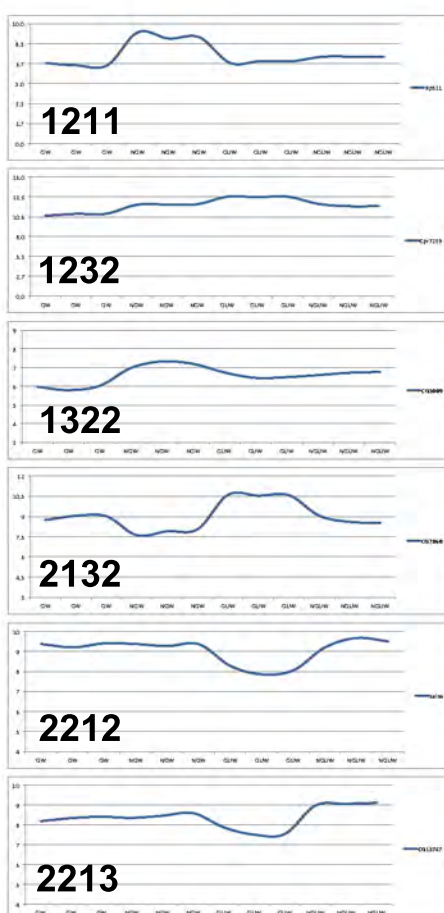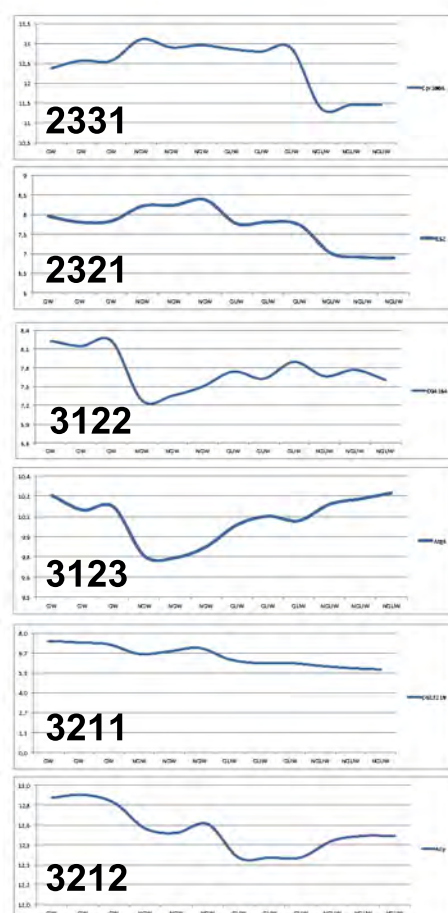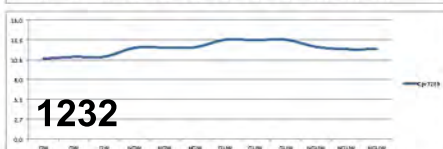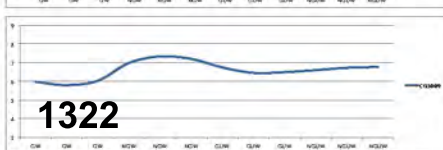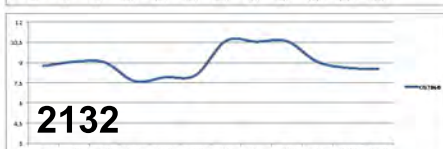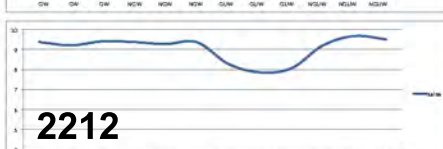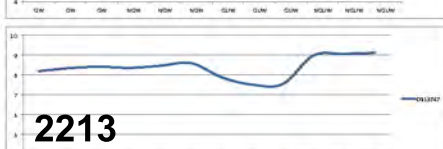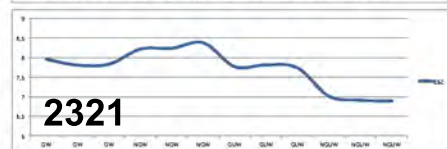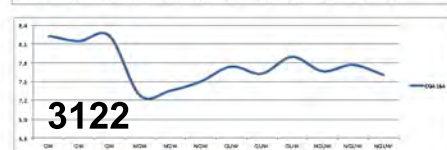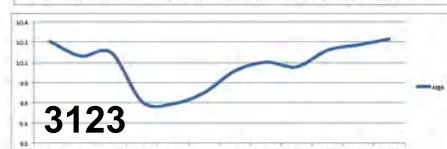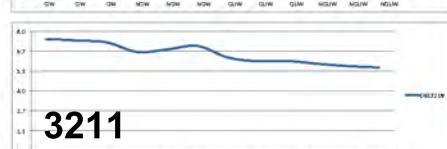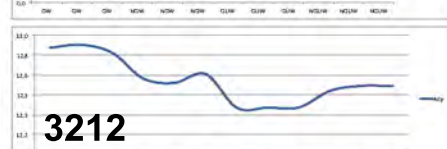

Supplement: S5 (10.1371/journal.pgen.1004965.s005) [file journal.pgen.1004965.s005]
